# Supplementary material
Source: PubMed Central journal article supplement (PMC3119530)
Supplement: NIHMS276050-supplement-Supplement1.pdf [file NIHMS276050-supplement-Supplement1.pdf]

## Supplementary Appendix

This appendix has been provided by the authors to give readers additional information about their work.

Supplement to: Mintz-Hittner HA, Kennedy KA, Chuang AZ. Efficacy of intravitreal bevacizumab for stage 3+ retinopathy of prematurity. *N Engl J Med* 2011;364:603-15.

## Supplemental Appendix

Authors: Helen A. Mintz-Hittner, M.D., Kathleen A. Kennedy, M.D., M.P.H., and Alice Z. Chuang, Ph.D. All authors work at the University of Texas Health Science Center at Houston-Medical School, Houston, TX.

## List of Contents

1. Table Summary of Changes to Protocol
2. Methods Intravitreal Injection of Bevacizumab  
Conventional Laser Therapy
3. Members of the BEAT-ROP Cooperative Group
4. Members of the Planning Committee
5. Members of the Executive Committee
6. Members of the BEAT-ROP Reading Center
7. Members of the BEAT-ROP Data and Safety Monitoring Board

Table 1: Summary of Changes to Protocol

| Protocol Number | Version Date | Suggested By | Changes                                                                                                                                                                                                                                                                                                                                                                                                                                                                                                                                                                                                                                                                                                                                                                                                                                                                                                                                                                                                                                      |
|-----------------|--------------|--------------|----------------------------------------------------------------------------------------------------------------------------------------------------------------------------------------------------------------------------------------------------------------------------------------------------------------------------------------------------------------------------------------------------------------------------------------------------------------------------------------------------------------------------------------------------------------------------------------------------------------------------------------------------------------------------------------------------------------------------------------------------------------------------------------------------------------------------------------------------------------------------------------------------------------------------------------------------------------------------------------------------------------------------------------------|
| 1               | 8/28/07      |              |                                                                                                                                                                                                                                                                                                                                                                                                                                                                                                                                                                                                                                                                                                                                                                                                                                                                                                                                                                                                                                              |
| 2               | 2/10/09      | DSMB         | <p>(1) Changed Electro-Retinograms to Visual Evoked Responses.</p> <p>(2) Maximum number of IVB injections to be 2 doses/infant.</p> <p>(3) Changed IVB needle to 31 gauge, 5/16 inch.</p> <p>(4) Added ocular examinations at ages 8 and 10 months for IVB infants (both IVB and CLT infants had ocular examinations at ages 6 months and 1 year).</p> <p>(5) Conscious sedation not required for IVB injections.</p> <p>(6) Intubations not required for CLT.</p> <p>(7) Primary outcome defined as successful treatment, i.e., no recurrence of ROP requiring re-treatment (IVB or CLT) in either eye before 54 weeks postmenstrual age (no eye would be allowed to become blind without all possible interventions including vitrectomy).</p> <p>(8) RetCam Reading Center to see photographs (IVB and CLT eyes) taken at 54 weeks: (a) to study masked: posterior retinas of all eyes masked (cropped to include optic nerve and macula but to conceal laser marks) and (b) to review unmasked: all eyes designated as recurrences.</p> |
| 3               | 6/1/09       | DSMB         | <p>(1) Primary outcome defined as failed treatment, i.e., recurrence of ROP requiring re-treatment (IVB or CLT) in either eye before 54 weeks postmenstrual age.</p> <p>(2) Data analysis specified as whole group (150 infants), then subgroups.</p> <p>(3) Ocular outcomes of each infant to be a 3-valued variable: 0 = no recurrence; 1 = one eye recurred; 2 = both eyes recurred.</p>                                                                                                                                                                                                                                                                                                                                                                                                                                                                                                                                                                                                                                                  |
| 4               | 10/20/09     | FDA          | (1) Removed Visual Evoked Responses--insufficient number of infants tested.                                                                                                                                                                                                                                                                                                                                                                                                                                                                                                                                                                                                                                                                                                                                                                                                                                                                                                                                                                  |

|   |          |        |                                                                                                                                                                                                                                                          |
|---|----------|--------|----------------------------------------------------------------------------------------------------------------------------------------------------------------------------------------------------------------------------------------------------------|
|   |          |        | (2) RetCam photographs were to have been documented at "ages 6 months (54 weeks postmenstrual age) and 12 months (80 weeks)"--however, some variability was to be allowed: 54 weeks (window of 50 to 70 weeks) and 80 weeks (window of 75 to 100 weeks). |
|   |          |        |                                                                                                                                                                                                                                                          |
| 5 | 12/28/10 | Update | (1) Last infant (#150) enrolled on 8/3/2010.                                                                                                                                                                                                             |
|   |          |        | (2) Last infant (#150) reached primary outcome on 11/14/2010.                                                                                                                                                                                            |
|   |          |        | (3) Enrollment ceased; follow-up to continue.                                                                                                                                                                                                            |
|   |          |        | (4) Recent IVB references added to protocol.                                                                                                                                                                                                             |
|   |          |        | (5) Discrepancies noted in protocol corrected: corrected in all sections: Primary outcome: recurrence of ROP requiring re-treatment (IVB or CLT) in either eye before 54 weeks postmenstrual age.                                                        |

## Supplementary Methods

### Intravitreal Injection of Bevacizumab

The infant was attached to a continuous cardio-respiratory monitor and a continuous pulse oximeter with specialized NRP-certified personnel in attendance at all times. At the discretion of the attending neonatologist, but not usually, the infant was premedicated with an oral, intramuscular, or intravenous sedative drug. A drop of tetracaine hydrochloride 0.5% or proparacaine hydrochloride 0.5% ophthalmic solution was placed into the conjunctival sac for local analgesia. A sterile speculum for use in preterm infants was placed between the lids of the right eye. Antisepsis was achieved with a drop of povidone iodine 5% ophthalmic solution placed between the lids into the conjunctival sac. Excessive povidone iodine was removed with a sterile cotton tip

applicator from the temporal lid margin. The infant's eye was stabilized with a sterile toothed forceps, cotton tip applicator, or scleral depressor. Bevacizumab (0.625 mg in 0.025 mL) in a single-use syringe with a 5/16<sup>th</sup> inch, 31 gauge needle attached was injected into the vitreous in a sterile manner behind the lens (about 2.5 mm posterior to the limbus aiming toward the posterior vitreous). Povidone iodine antiseptis was applied to the eye again. The sterile speculum was removed from between the lids. The same procedure was followed for the left eye. An ophthalmic antibiotic drop was prescribed for both eyes to be used every six hours for seven days.

#### Conventional Laser Therapy (CLT):

Except for seven CLT infants (at two sites) who received conscious sedation, the infant was placed under general anesthesia (endotracheal intubation) attached to a continuous cardio-respiratory monitor and a continuous pulse oximeter with anesthesia-certified personnel in attendance at all times. A sterile speculum for use in preterm infants was placed between the lids of the right eye. The infant's eye was stabilized with a sterile toothed forceps, cotton tip applicator, or scleral depressor. The diode laser indirect ophthalmoscope with a 28D lens (resulting in a 560 micrometer lesion) was utilized to apply multiple applications at approximately 810 nanometers (red part of the optical spectrum) to the retina. The pulse duration, pulse interval, and the power varied at different sites, but all treatment was confluent. If any areas were skipped, the surgeon was allowed to fill in these skipped areas within one week of the initial treatment. Under direct visualization with the indirect ophthalmoscope, a variable number of laser pulses were applied to destroy the retinal layers of the avascular retina (source of angiogenic factors). Following these applications, the lid speculum was removed, and an antibiotic

and dilating drop of choice were instilled between the lids of the right eye. The same procedure was followed for the left eye. Ophthalmic antibiotic, dilating, and anti-inflammatory drops were prescribed for both eyes to be used every six hours for a variable number of weeks.

Members of the BEAT-ROP Cooperative Group:

Principal Investigator: Helen A. Mintz-Hittner, M.D., the University of Texas Health Science Center at Houston-Medical School, Memorial Hermann Medical Plaza, 6400 Fannin St., Suite 1800, Houston, TX 77030, e-mail: [Helen.A.Mintz-Hittner@uth.tmc.edu](mailto:Helen.A.Mintz-Hittner@uth.tmc.edu).

Hospitals/Centers, Investigators, and Clinical Coordinators: 1) Huntington Memorial Hospital, Pasadena, CA: Ricardo L. Liberman, M.D. (neonatologist) and Khaled A. Tawansy, M.D. (vitreo-retinal surgeon) (co-investigators); 2) Presbyterian-St. Luke's Hospital, Rocky Mountain Hospital for Children, Denver, CO: Delphine M. Eichorst, M.D. (neonatologist), Robert A. King, M.D. (pediatric ophthalmologist) and Christopher Bardorf, M.D. (pediatric ophthalmologist) (co-investigators); Melissa Rutt, R.N., B.S.N. (clinical coordinator); 3) Children's Hospital of Illinois, OSF St. Francis Medical Center: James R. Hocker, M.D. (neonatologist), Steven J. Lichtenstein, M.D. (pediatric ophthalmologist) and Parashos A. Lagouros, M.D. (vitreo-retinal surgeon) (co-investigators); Julie A. Hodges, R.N.C., B.S.N. (clinical coordinator); 4) Palmetto Health Baptist Hospital, Columbia, SC: Sharon S. Ellis, M.D. (neonatologist) and W. Lloyd Clark, M.D. (vitreo-retinal surgeon) (co-investigators); Sharon Emory, R.N. (clinical coordinator); 5) Palmetto Health Richland Hospital, Columbia, SC: Victor N. Iskersky,

M.D. (neonatologist) and W. Lloyd Clark, M.D. (vitreoretinal surgeon) (co-investigators); Sharon Emory, R.N. (clinical coordinator); 6) Driscoll Children's Hospital, Corpus Christi, TX: Patricia L. Ramsay, M.D., Ph.D. (neonatologist) and Helen A. Mintz-Hittner, M.D. (pediatric ophthalmologist) (co-investigators); Kathy S. Sanchez, R.N. (clinical coordinator); 7) Baylor University Medical Center, Dallas, TX: Craig T. Shoemaker, M.D. (neonatologist) and Rand W. B. Spencer, M.D. (vitreoretinal surgeon) (co-investigators); Rachel Ross, R.N., M.S.N. (clinical coordinator); 8) Del Sol Medical Center, El Paso, TX: Enrique N. Ponte, M.D. (neonatologist) and Helen A. Mintz-Hittner, M.D. (pediatric ophthalmologist) (co-investigators); Michael A. Lason, R.N., N.N.P.-B.C. (clinical coordinator); 9) Las Palmas Medical Center, El Paso, TX: Luis A. Ayo, M.D. (neonatologist) and Helen A. Mintz-Hittner, M.D. (pediatric ophthalmologist) (co-investigators); Sandra C. Dieguez (clinical coordinator); 10) R.E. Thomason Hospital, the University of Texas Health Science Center at El Paso-Medical School, El Paso, TX: Garrett S. Levin, M.D. (neonatologist) and Violeta Radenovich, M.D., M.P.H. (pediatric ophthalmologist) (co-investigators); Leticia Guerra, R.N. (clinical coordinator); 11) Cook Children's Medical Center, Fort Worth, TX: David M. Riley, M.D. (neonatologist), Michael G. Hunt, M.D. (pediatric ophthalmologist), E. Alan Packwood, M.D. (pediatric ophthalmologist), and Alan A. Norman, M.D. (pediatric ophthalmologist) (co-investigators); Melinda Meacham, R.N., M.S.N., C.C.R.C. (clinical coordinator); 12) Children's Memorial Hermann Hospital, the University of Texas Health Science Center at Houston-Medical School, Houston, TX: Sophia Tsakiri, M.D. (neonatologist) and Helen A. Mintz-Hittner, M.D. (pediatric ophthalmologist) (co-investigators); De'Ann Pulido, R.N. (clinical coordinator); 13) Memorial Hermann Southwest Hospital, the



University of Texas Health Science Center at Houston-Medical School, Houston, TX: Syed Hassan Haider, M.D. (neonatologist) and Helen A. Mintz-Hittner, M.D. (pediatric ophthalmologist) (co-investigators); Linda Wernecke, R.N. (clinical coordinator); 14) St. Joseph Medical Center, Houston, TX: Elizabeth O'Donnell, M.D. (neonatologist) and Helen A. Mintz-Hittner, M.D. (pediatric ophthalmologist) (co-investigators); Maria Mares (clinical coordinator); 15) Clear Lake Regional Medical Center, Webster, TX : Harvinder S. Bedi, M.D. (neonatologist) and Helen A. Mintz-Hittner, M.D. (pediatric ophthalmologist) (co-investigators); Leah M. Best, R.N., N.N.P.-B.C., Ph.D. (clinical coordinator).

Confirming Ophthalmologist: Ronan E. O'Malley, M.D. (vitreo-retinal surgeon), Houston, TX.

Compounding Pharmacist: Kenneth L. Hughes, R.Ph., Greenpark Compounding Pharmacy, Houston, TX.

Research Assistants: Cary Warner, Clinical Research Unit at Memorial Hermann Hospital, Houston, TX; Research Assistant: Maria Mares, Houston, TX; Research Assistant: Linda M. Rhodes, Houston TX; Research Assistant: Susan M. Hittner, B.B.A., M.B.A., Houston, TX; Technical Assistant: Kimberly A. Mankiewicz, Ph.D.

Members of the Planning Committee:

(Three members) Helen A. Mintz-Hittner, M.D., Department of Ophthalmology and Visual Science, the University of Texas Health Science Center at Houston-Medical

School: Principal Investigator of the BEAT-ROP Clinical Trial, Sponsor of the BEAT-ROP Clinical Trial (obtained the BEAT-ROP FDA IND, listed the BEAT-ROP Clinical Trial on Clinicaltrials.gov, and provided funding from Alfred W. Lasher III Professorship research funds) and Pediatric Ophthalmologist Co-PI at the Children's Memorial Hermann Hospital; Kathleen A. Kennedy, M.D., M.P.H., Department of Pediatrics, the University of Texas Health Science Center at Houston-Medical School: Study Coordinator and Randomizer; and Sophia Tsakiri, M.D., Department of Pediatrics, the University of Texas Health Science Center at Houston-Medical School: Neonatologist Co-PI at the Children's Memorial Hermann Hospital.

Members of the Executive Committee:

(Thirteen members) All participating ophthalmologists: (in alphabetical order): Christopher Bardorf, M.D. (pediatric ophthalmologist); W. Lloyd Clark, M.D. (vitreo-retinal surgeon), Michael G. Hunt, M.D. (pediatric ophthalmologist), Robert A. King, M.D. (pediatric ophthalmologist), Parashos A. Lagouros, M.D. (vitreo-retinal surgeon), Steven J. Lichtenstein, M.D. (pediatric ophthalmologist); Helen A. Mintz-Hittner, M.D. (pediatric ophthalmologist), Alan A. Norman, M.D. (pediatric ophthalmologist), E. Alan Packwood, M.D. (pediatric ophthalmologist), Ronan E. O'Malley, M.D. (vitreo-retinal surgeon); Violeta Radenovich, M.D., M.P.H. (pediatric ophthalmologist), Rand W. B. Spencer, M.D. (vitreo-retinal surgeon), and Khaled A. Tawansy, M.D. (vitreo-retinal surgeon).

Members of the BEAT-ROP Reading Center:

(Six members) Established at the World ROP Congress 2009, New Delhi, India, November 21<sup>st</sup>-23<sup>rd</sup>, 2009: Michael F. Chiang, M.D., Harkness Eye Institute, Columbia University, New York, NY, USA; Michael Shapiro, M.D, University of Illinois, College of Medicine, Chicago, IL, USA; Susana M. Teixeira, M.D., Lisbon, Portugal; Anand Vinekar, M.D., Bangalore, India.; Parag K. Shah, M.D., Tamil Nadu, India; Alay S. Banker, M.D., Ahmedabad, India.

Members of the BEAT-ROP Data and Safety Monitoring Board:

(Five members) Jon E. Tyson, M.D., M.P.H., the University of Texas Health Science Center at Houston-Medical School (Chairman); Robert E. Lasky, Ph.D., the University of Texas Health Science Center at Houston-Medical School (Statistician); Ms. Paula L. Knudson, the University of Texas Health Science Center at Houston-Medical School (Ethicist); Keith A. Bourgeois, M.D., (Vitreoretinal surgeon-private practice); and Frank L. Kretzer, Ph.D., Baylor College of Medicine (Teaching and ROP research).
